# Supplementary material for: YouTube: Is It a Reliable Source of Nutrition Information on COVID-19 Pandemic?
Source: MDPI journal article supplement (doi:10.3390/healthcare10101911), 2022-09-29
Supplement: s1 [file s1]

**Supplementary Table S1:** Video publishing category descriptions.

| <b>Video Source Category</b> | <b>Description</b>                                                                                             |
|------------------------------|----------------------------------------------------------------------------------------------------------------|
| News channels                | Created by news channels.                                                                                      |
| Health professionals         | Created by doctors, dietitians, nurses, pharmacist.                                                            |
| Health centres               | Created by hospital or inpatient services.                                                                     |
| TV channels                  | Created by TV channels.                                                                                        |
| Government organisations     | Uploaded by a government agency or organisation.                                                               |
| Educational organisations    | Created by educational organisations including universities.                                                   |
| Independent users            | Individual or group of individuals with no professional credentials or established organizational affiliation. |

**Supplementary Table S2. Modified DISCERN Score.**

1. Are the aims clear and achieved?
2. Are reliable sources of information used? (i.e., publication cited, speaker is a certified physician)
3. Is the information presented balanced and unbiased?
4. Are additional sources of information listed for patient reference?
5. Are areas of uncertainty mentioned?

**Supplementary Table S3. Journal of the American Medical Association Score (JAMAS).**

|             |                                                                                                                                                                                                     |
|-------------|-----------------------------------------------------------------------------------------------------------------------------------------------------------------------------------------------------|
| Authorship  | Authors and contributors, their affiliations, and relevant credentials should be provided                                                                                                           |
| Attribution | References and sources for all content should be listed clearly, and all relevant copyright information should be noted                                                                             |
| Disclosure  | Website “ownership” should be prominently and fully disclosed, as should any sponsorship, advertising, underwriting, commercial funding arrangements or support, or potential conflicts of interest |
| Currency    | Dates when content was posted and updated should be indicated                                                                                                                                       |

**Supplementary Table S4. Audio-Visual Quality.**

- 3 - Excellent - Clear, professional editing
- 2 - Average - non-professional editing
- 1 - Poor - blurry, out of focus, unintelligible
- 0 - Unable to view

**Supplementary Table S5. Accuracy Score.**

- 3 - Excellent - Professional level, highly accurate
- 2 - Average - Some oversimplification, overall correct information
- 1 - Poor - Easily identified inaccurate information
- 0 - Misleading and grossly inaccurate

**Supplementary Table S6. Comprehensiveness Score.**

- 3 - Excellent - Covers all relevant information
- 2 - Average - Covers most relevant information
- 1 - Poor - Lacking important information
- 0 - No information provided

**Supplementary Table S7.** Title–content consistency index.

| Number of statements | Statements                                                                                                                    |
|----------------------|-------------------------------------------------------------------------------------------------------------------------------|
| 1                    | Eye-catching thumbnail pictures and sensationalist headlines to capture attention, but video title does not match the content |
| 2                    | Visually attractive thumbnail, strong emotionally appealing headlines, and only a little relevant information listed          |
| 3                    | Some relevant information listed, but large gaps between title and its content                                                |
| 4                    | Most of the relevant information discussed, but small gaps between title and its content                                      |
| 5                    | An excellent title for the content                                                                                            |

**Supplementary Table S8.** Global Quality Score for educational value.

|                                                                                                        |
|--------------------------------------------------------------------------------------------------------|
| 1 Poor quality; very unlikely to be of any use to patients.                                            |
| 2 Poor quality but some information present; of very limited use to patients.                          |
| 3 Suboptimal flow, some information covered but important topics missing; somewhat useful to patients. |
| 4 Good quality and flow, most important topics covered; useful to patients.                            |
| 5 Excellent quality and flow; highly useful to patients.                                               |

**Supplementary Table S9.** Examples of misleading nutrition information.

| Misleading Information                                      |
|-------------------------------------------------------------|
| You should not eat foods containing gluten during pandemic. |
| Homemade yoghurt is probiotic food.                         |
| Intermittent fasting should be suggested during pandemic.   |
| Pistachio can prevent from COVID-19.                        |

**Supplementary Table S10.** Determining the relationship level between scores.

|          |   | VPI      | JAMAS    | mDISCERN | AS       | GQS      | CS       | TCCI     | AVQ        |
|----------|---|----------|----------|----------|----------|----------|----------|----------|------------|
| VPI      | r |          | 0.078    | 0.145*   | 0.043    | 0.100    | 0.012    | 0.125    | 0.276**    |
|          | p |          | 0.279    | 0.040    | 0.529    | 0.140    | 0.863    | 0.064    | p < 0.01   |
| JAMAS    | r | 0.078    |          | 0.352**  | 0.220**  | 0.188**  | 0.237    | 0.242**  | 0.130      |
|          | p | 0.279    |          | p < 0.01 | p < 0.01 | p < 0.01 | 0.001    | p < 0.01 | 0.071      |
| mDISCERN | r | 0.145*   | 0.352**  |          | 0.434**  | 0.545**  | 0.600**  | 0.409**  | 0.222**    |
|          | p | 0.040    | p < 0.01 |          | p < 0.01 | p < 0.01 | 0.00     | p < 0.01 | p < 0.01   |
| AS       | r | 0.043    | 0.220**  | 0.434**  |          | 0.773**  | 0.665**  | 0.579**  | 0.311**    |
|          | p | 0.529    | 0.002    | p < 0.01 |          | p < 0.01 | 0.00     | p < 0.01 | p < 0.01   |
| GQS      | r | 0.100    | 0.188**  | 0.545**  | 0.773**  |          | 0.791**  | 0.771**  | 0.287**    |
|          | p | 0.140    | p < 0.01 | p < 0.01 | p < 0.01 |          | p < 0.01 | p < 0.01 | 0 p < 0.01 |
| CS       | r | 0.012    | 0.237    | 0.600**  | 0.665**  | 0.791**  |          | 0.764**  | 0.236**    |
|          | p | 0.863    | 0.001    | p < 0.01 | p < 0.01 | p < 0.01 |          | p < 0.01 | 0.001      |
| TCCI     | r | 0.125    | 0.242**  | 0.409**  | 0.579**  | 0.771**  | 0.764**  |          | 0.234**    |
|          | p | 0.064    | p < 0.01 |          | 0.001      |
| AVQ      | r | 0.276**  | 0.130    | 0.222**  | 0.311**  | 0.287**  | 0.236**  | 0.234**  |            |
|          | p | p < 0.01 | 0.071    | p < 0.01 |            |

r, Spearman's rho \*p < 0.05, \*\*p < 0.01, \*\*\*p < 0.001
